# Supplementary material
Source: PubMed Central journal article supplement (PMC3052215)

**Figure Legends**

**Supplemental Figure I.**

**The values of U-B2MG (A) and U-NAG (B) stratified according to the prognostic stages of CKD and U-B2MG (C) and U-NAG (D) stratified according to the number of components of metabolic syndrome adjusting gender and age.**

Data are means  $\pm$  SE. The differences between groups were assessed by ANCOVA.

Non-metabolic syndrome and metabolic syndrome are indicated by open and closed bars, respectively. Non-CKD and CKD are indicated by open and closed bars, respectively.

**Supplemental Table I.****Multivariable-adjusted linear regression analysis of S-CysC, log UACR, logUCCR, log U-B2MG, and log U-NAG**

|             | S-CysC             | log UACR            | log UCCR            | logU-B2MG          | log U-NAG           |
|-------------|--------------------|---------------------|---------------------|--------------------|---------------------|
| Leptin      | 0.536 <sup>†</sup> | 0.170 <sup>**</sup> | 0.303 <sup>†</sup>  | 0.279 <sup>†</sup> | 0.122               |
| Adiponectin | 0.136 <sup>*</sup> | 0.117               | 0.115               | 0.123              | -0.127              |
| CRP         | 0.030              | 0.091               | -0.071              | 0.032              | 0.063               |
| S-CysC      | -                  | 0.298 <sup>†</sup>  | 0.434 <sup>†</sup>  | 0.304 <sup>†</sup> | 0.088               |
| log UACR    | 0.281 <sup>†</sup> | -                   | 0.131 <sup>*</sup>  | 0.251 <sup>†</sup> | 0.132 <sup>*</sup>  |
| log UCCR    | 0.366 <sup>†</sup> | 0.120 <sup>*</sup>  | -                   | 0.335 <sup>†</sup> | 0.178 <sup>**</sup> |
| log U-B2MG  | 0.247 <sup>†</sup> | 0.215 <sup>†</sup>  | 0.322 <sup>†</sup>  | -                  | 0.244 <sup>†</sup>  |
| log U-NAG   | 0.075              | 0.118 <sup>*</sup>  | 0.180 <sup>**</sup> | 0.257 <sup>†</sup> | -                   |
| CAVI        | 0.100              | 0.203 <sup>**</sup> | 0.173 <sup>**</sup> | 0.116              | 0.090               |

Abbreviations used in this table are the same as in Table 1. Data were the correlation coefficients ( $\beta$ ) analyzed by linear regression analysis of S-CysC, log UACR, log UCCR, log U-B2MG, and log U-NAG with adjustments for gender, age, BMI, systolic blood pressure, fasting plasma glucose, IRI, TG, HDL-C and LDL-C. \*  $P < 0.05$ , \*\*  $P < 0.01$ , <sup>†</sup>  $P < 0.001$

**Supplemental Table II.**

**A stepwise multivariate regression analysis of logUACR and logUCCR with the metabolic variables as independent variables.**

| <b>Dependent variable</b> | <b>Partial correlation coefficient</b> | <b><math>\beta</math></b> | <b>P value</b>   | <b><math>r^2</math></b> |
|---------------------------|----------------------------------------|---------------------------|------------------|-------------------------|
| <b>logUACR</b>            | <b>Age</b>                             | <b>0.300</b>              | <b>&lt;0.001</b> | <b>0.171</b>            |
|                           | <b>Systolic blood pressure</b>         | <b>0.160</b>              | <b>0.002</b>     |                         |
|                           | <b>HbA1c</b>                           | <b>0.210</b>              | <b>&lt;0.001</b> |                         |
| <b>logUCCR</b>            | <b>Age</b>                             | <b>0.227</b>              | <b>&lt;0.001</b> | <b>0.147</b>            |
|                           | <b>HbA1c</b>                           | <b>0.164</b>              | <b>0.001</b>     |                         |
|                           | <b>Leptin</b>                          | <b>0.292</b>              | <b>&lt;0.001</b> |                         |

Abbreviations used in this table are the same as in Table 1. A stepwise multivariate regression analysis was performed to explore the factors related to the baseline levels in logUACR and logUCCR in all patients. The independent variables that were entered into stepwise multivariate regression analysis were as follows: gender, age, BMI, waist circumference, systolic blood pressure, diastolic blood pressure, fasting plasma glucose, IRI, HbA1c, TG, HDL-C, LDL-C, leptin, adiponectin, and CRP.

**Supplemental Table III.**

**Correlations between the changes of logUCCR and those of the metabolic variables and a stepwise multivariate regression analysis of those of logUCCR with the metabolic variables as independent variables.**

|                                                                                   | $\Delta\log\text{UCCR}$ |       |
|-----------------------------------------------------------------------------------|-------------------------|-------|
|                                                                                   | coefficients            | P     |
| <b>Univariable analysis (<i>r</i>-coefficient)</b>                                |                         |       |
| Age                                                                               | -0.098                  | 0.193 |
| $\Delta\text{BMI}$                                                                | 0.221                   | 0.003 |
| $\Delta\text{Waist circumference}$                                                | 0.009                   | 0.910 |
| $\Delta\text{Systolic blood pressure}$                                            | -0.021                  | 0.559 |
| $\Delta\text{Diastolic blood pressure}$                                           | 0.044                   | 0.447 |
| $\Delta\text{Fasting plasma glucose}$                                             | 0.100                   | 0.183 |
| $\Delta\text{HbA1c}$                                                              | 0.159                   | 0.037 |
| $\Delta\text{IRI}$                                                                | 0.033                   | 0.669 |
| $\Delta\text{Triglyceride}$                                                       | 0.049                   | 0.520 |
| $\Delta\text{HDL-C}$                                                              | 0.032                   | 0.668 |
| $\Delta\text{LDL-C}$                                                              | 0.052                   | 0.493 |
| $\Delta\text{Leptin}$                                                             | 0.036                   | 0.638 |
| $\Delta\text{Adiponectin}$                                                        | -0.075                  | 0.321 |
| $\Delta\text{CRP}$                                                                | 0.034                   | 0.656 |
| $\Delta\text{eGFR}$                                                               | -0.044                  | 0.459 |
| $\Delta\text{S-CysC}$                                                             | 0.009                   | 0.910 |
| $\Delta\log\text{UACR}$                                                           | 0.020                   | 0.794 |
| $\Delta\log\text{U-B2MG}$                                                         | 0.029                   | 0.705 |
| $\Delta\log\text{U-NAG}$                                                          | 0.025                   | 0.736 |
| $\Delta\text{CAVI}$                                                               | 0.198                   | 0.014 |
| <b>Stepwise multivariate regression analysis (<math>\beta</math>-coefficient)</b> |                         |       |
| $\Delta\text{BMI}$                                                                | 0.221                   | 0.003 |

Abbreviations used in this table are the same as in Table 1. The independent variables that were entered into a stepwise multivariate regression analysis were as follows: gender, age,  $\Delta\text{BMI}$ ,  $\Delta\text{waist circumference}$ ,  $\Delta\text{systolic blood pressure}$ ,  $\Delta\text{diastolic blood pressure}$ ,  $\Delta\text{fasting plasma glucose}$ ,  $\Delta\text{IRI}$ ,  $\Delta\text{HbA1c}$ ,  $\Delta\text{TG}$ ,  $\Delta\text{HDL-C}$ ,  $\Delta\text{LDL-C}$ ,  $\Delta\text{leptin}$ ,  $\Delta\text{adiponectin}$ , and  $\Delta\text{CRP}$ .

**Supplemental Figure I**

**A. U- $\beta_2$ MG**

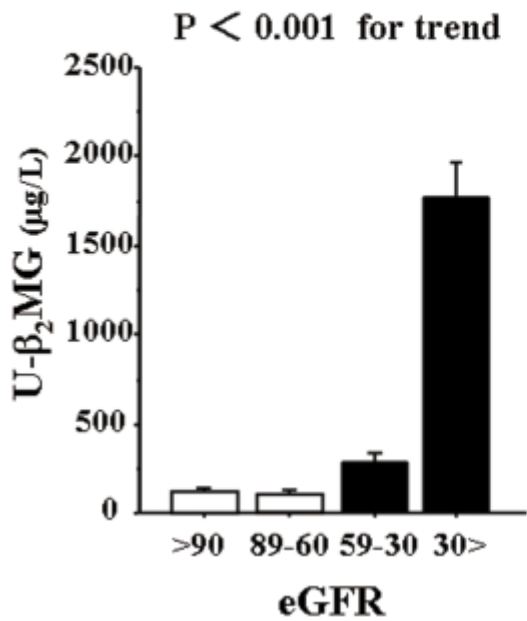

**B. U-NAG**

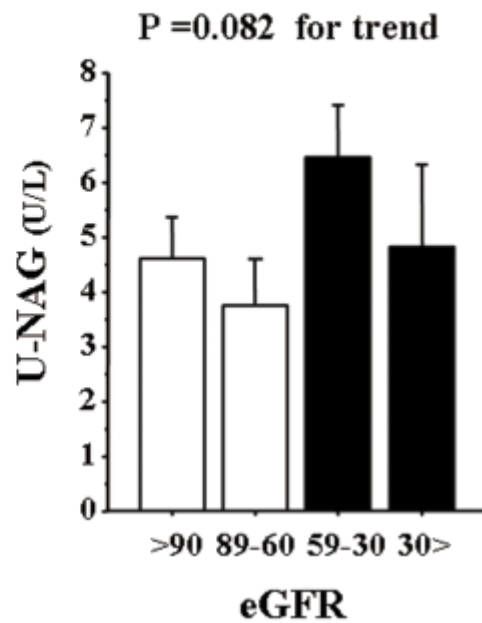

**C. U- $\beta_2$ MG**

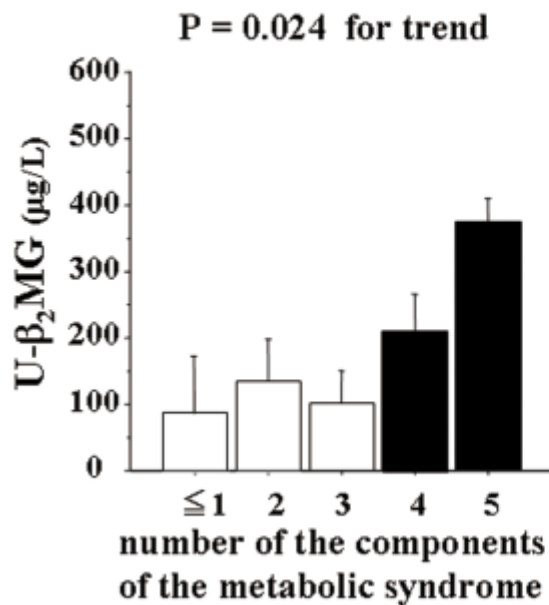

**D. U-NAG**

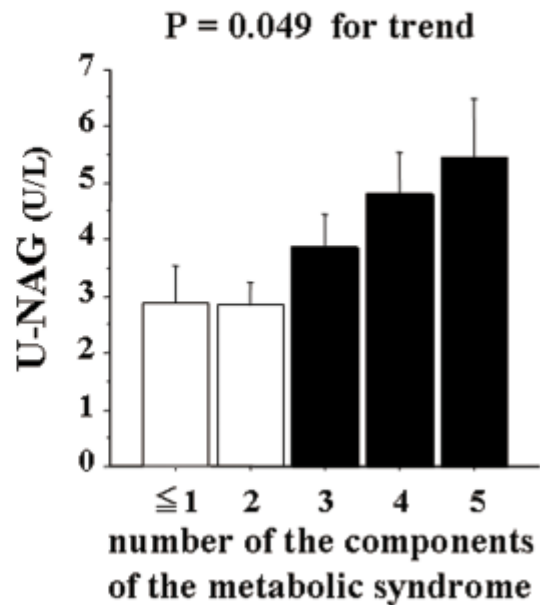

Supplement: supp_CJN.04830610_final_version_Supplemental_File.pdf [file supp_CJN.04830610_final_version_Supplemental_File.pdf]
